# Supplementary material for: Genetic Analysis of Zinc-Finger Nuclease-Induced Gene Targeting in Drosophila
Source: Oxford University Press journal article supplement (doi:10.1534/genetics.109.101329), 2009-04-21
Supplement: tables1.pdf [file tables1.pdf]

**TABLE S1**  
**Statistical analysis of gene targeting parameters**

| Males     |                                                   | ----- p values -----   |                        |                         |
|-----------|---------------------------------------------------|------------------------|------------------------|-------------------------|
| Genotypes |                                                   | %Yielders              | %ry                    | %HR                     |
| M1 : M2   | wt vs. <i>spnA</i> <sup>+/-</sup>                 | 0.81                   | 0.623                  | 0.14                    |
| M1 : M3   | “                                                 | 0.19                   | 0.126                  | 0.40                    |
| M1 : M4   | wt vs. <i>spnA</i> <sup>-/-</sup>                 | 0.69                   | 0.024                  | 9 x 10 <sup>-6</sup>    |
| M1 : M5   | “                                                 | 0.028                  | 0.51                   | 0.00064                 |
| M1 : M6   | “                                                 | 0.00042                | 0.222                  | 0.00059                 |
| M1 : M7   | wt L vs. C                                        | 0.76                   | 0.118                  | 0.30                    |
| M1 : M12  | wt L2 vs. L3                                      | 1.0                    | 0.017                  | 0.67                    |
| M7 : M8   | wt vs. <i>spnA</i> <sup>+/-</sup> C               | 0.094                  | 0.00025                | 0.013                   |
| M7 : M9   | “                                                 | 0.50                   | 0.381                  | 0.22                    |
| M7 : M10  | wt vs. <i>spnA</i> <sup>-/-</sup> C               | 0.010                  | 0.011                  | 3 x 10 <sup>-5</sup>    |
| M7 : M11  | “                                                 | 0.53                   | 0.261                  | 3 x 10 <sup>-5</sup>    |
| M12 : M13 | wt vs. <i>okr</i> <sup>+/-</sup>                  | 0.21                   | 0.614                  | 0.010                   |
| M12 : M14 | wt vs. <i>okr</i> <sup>-/-</sup>                  | 0.47                   | 0.194                  | 0.071                   |
| M1 : M15  | wt vs. <i>lig4</i>                                | 1.6 x 10 <sup>-5</sup> | 0.000425               | 7 x 10 <sup>-11</sup>   |
| M1 : M16  | wt vs. <i>lig4 spnA</i> <sup>-/-</sup>            | 0.0019                 | 0.219                  | 0.028                   |
| M7 : M17  | wt vs. <i>lig4</i> C                              | 0.0056                 | 7.7 x 10 <sup>-8</sup> | 0.019                   |
| M7 : M18  | wt vs. <i>lig4 spnA</i> <sup>-/-</sup> C          | 0.00087                | 0.38                   | 0.0025                  |
| M15 : M16 | <i>lig4</i> vs. <i>lig4 spnA</i> <sup>-/-</sup>   | 0.83                   | 0.0016                 | 9.5 x 10 <sup>-14</sup> |
| M17 : M18 | <i>lig4</i> vs. <i>lig4 spnA</i> <sup>-/-</sup> C | 1.0                    | 0.00048                | 4.4 x 10 <sup>-7</sup>  |
| M5 : M10  | <i>spnA</i> <sup>-/-</sup> L vs. C                | 0.84                   | 0.061                  | 0.060                   |
| M6 : M11  | “                                                 | 0.011                  | 0.439                  | 0.0031                  |
| M15 : M17 | <i>lig4</i> L vs. C                               | 0.83                   | 0.278                  | 0.0043                  |
| M16 : M18 | <i>lig4 spnA</i> <sup>-/-</sup> L vs. C           | 1.0                    | 0.487                  | 0.014                   |

  

| Females   |                                     | ----- p values ----- |        |                      |
|-----------|-------------------------------------|----------------------|--------|----------------------|
| Genotypes |                                     | %Yielders            | %ry    | %HR                  |
| F1 : F2   | wt vs. <i>spnA</i> <sup>+/-</sup>   | 0.68                 | 0.8    | 0.19                 |
| F1 : F3   | “                                   | 0.026                | 0.223  | 1.0                  |
| F1 : F6   | wt vs. <i>spnA</i> <sup>-/-</sup>   | 8 x 10 <sup>-9</sup> | 0.485  | 5 x 10 <sup>-8</sup> |
| F1 : F7   | wt L vs. C                          | 0.62                 | 0.731  | 0.32                 |
| F1 : F12  | wt L2 vs. L3                        | 0.84                 | 0.588  | 0.0040               |
| F7 : F8   | wt vs. <i>spnA</i> <sup>+/-</sup> C | 0.14                 | 0.0623 | 0.033                |
| F7 : F9   | “                                   | 1.0                  | 0.587  | 0.14                 |

|           |                                                             |         |                        |                         |
|-----------|-------------------------------------------------------------|---------|------------------------|-------------------------|
| F7 : F11  | wt vs. <i>spnA</i> <sup>-/-</sup> C                         | 0.00026 | 0.95                   | 4 x 10 <sup>-7</sup>    |
| F1 : F19  | wt vs. <i>lig4</i> <sup>+/-</sup>                           | 0.69    | 0.0923                 | 0.025                   |
| F1 : F20  | wt vs. <i>lig4</i> <sup>-/-</sup>                           | 0.012   | 0.00046                | 8 x 10 <sup>-25</sup>   |
| F7 : F21  | wt vs. <i>lig4</i> <sup>-/-</sup> C                         | 0.0053  | 0.00395                | 4 x 10 <sup>-5</sup>    |
| F20 : F21 | <i>lig4</i> <sup>-/-</sup> L vs. C                          | 0.86    | 0.803                  | 6.5 x 10 <sup>-8</sup>  |
| F19 : F20 | <i>lig4</i> <sup>-/-</sup> L vs. <i>lig4</i> <sup>+/-</sup> | 0.0042  | 6.7 x 10 <sup>-6</sup> | 9.4 x 10 <sup>-11</sup> |

| Males vs. Females |                              | ----- p values -----   |                         |                         |
|-------------------|------------------------------|------------------------|-------------------------|-------------------------|
| Genotypes         |                              | %Yielders              | %ry                     | %HR                     |
| M1 : F1           | wt L                         | 0.54                   | 0.191                   | 0.035                   |
| M2 : F2           | <i>spnA</i> <sup>+/-</sup>   | 1.0                    | 0.158                   | 0.15                    |
| M3 : F3           | “                            | 0.0035                 | 9.6 x 10 <sup>-9</sup>  | 0.046                   |
| M6 : F6           | <i>spnA</i> <sup>-/-</sup>   | 0.00042                | 0.49                    | 0.11                    |
| M7 : F7           | wt C                         | 0.72                   | 0.524                   | 0.22                    |
| M8 : F8           | <i>spnA</i> <sup>+/-</sup> C | 1.2 x 10 <sup>-5</sup> | 1.2 x 10 <sup>-10</sup> | 0.024                   |
| M11 : F11         | <i>spnA</i> <sup>-/-</sup> C | 0.0027                 | 0.825                   | 1.0                     |
| M12 : F12         | wt AB3                       | 0.46                   | 0.0274                  | 4.6 x 10 <sup>-6</sup>  |
| M13 : F13         | <i>okr</i> <sup>+/-</sup>    | 0.30                   | 2.52 x 10 <sup>-5</sup> | 1.0                     |
| M15 : F20         | <i>lig4</i>                  | 0.63                   | 0.394                   | 1.9 x 10 <sup>-12</sup> |
| M17 : F21         | <i>lig4</i> C                | 0.63                   | 0.089                   | 0.0030                  |

Genotypes are as in Table 2, with M indicating males and F indicating females of specified class. %Yielders, %ry and %HR have the same meanings as in Table 2 of the main text. L denotes linear donor, C denotes circular donor. As stated in the main text, p values were calculated with Fisher's exact test for %Yielders and %HR, and with the glm function of the R software package for %ry.
